# Supplementary material
Source: ML conference proceedings conference paper supplement (https://proceedings.neurips.cc/paper_files/paper/2020/hash/30de9ece7cf3790c8c39ccff1a044209-Abstract.html)
Supplement: Supplementary file [file 30de9ece7cf3790c8c39ccff1a044209-Supplemental.zip]

# AvE Supplementary Material

## 1 Additional Gridworld Experiments

In the main paper we highlight the most interesting scenarios where assistance is necessary: where the human is trapped by immovable boxes in either the corner or center of the grid. We also tested other initializations as follows:

| Human in Corner — Success %, (Mean Steps) | LG Set      | SG Set               | NG                   |
|-------------------------------------------|-------------|----------------------|----------------------|
| GI (known)                                | 87%, (1.79) | <b>100%</b> , (1.79) |                      |
| GI (unknown)                              | 86%, (1.79) | 88%, (1.82)          |                      |
| Empowerment                               |             |                      | <b>100%</b> , (2.13) |

Table 1: Random initialization of the human’s position, the goal’s position, and the position of two blocks. Results averaged across 100 trials. GI – goal inference with either a (known) goal in the goal set or an (unknown) goal missing from the goal set. Large Goal (LG) Set considered every possible space as a goal, Small Goal (SG) Set only considered two possible goals, and No Goal (NG) is our method.

| Human in Corner — Success %, (Mean Steps) | LG Set      | SG Set               | NG                   |
|-------------------------------------------|-------------|----------------------|----------------------|
| GI (known)                                | 89%, (3.25) | <b>100%</b> , (3.25) |                      |
| GI (unknown)                              | 89%, (3.25) | 96%, (3.25)          |                      |
| Empowerment                               |             |                      | <b>100%</b> , (3.73) |

Table 2: Human randomly initialized in any corner and goal randomly initialized. Blocks initialized to be one space away from trapping the human. Results averaged across 100 trials. GI – goal inference with either a (known) goal in the goal set or an (unknown) goal missing from the goal set. Large Goal (LG) Set considered every possible space as a goal, Small Goal (SG) Set only considered two possible goals, and No Goal (NG) is our method.

## 2 User Study Results

Please see the attached `AvE User Study Results Video.mp4` for recorded clips from the user study.

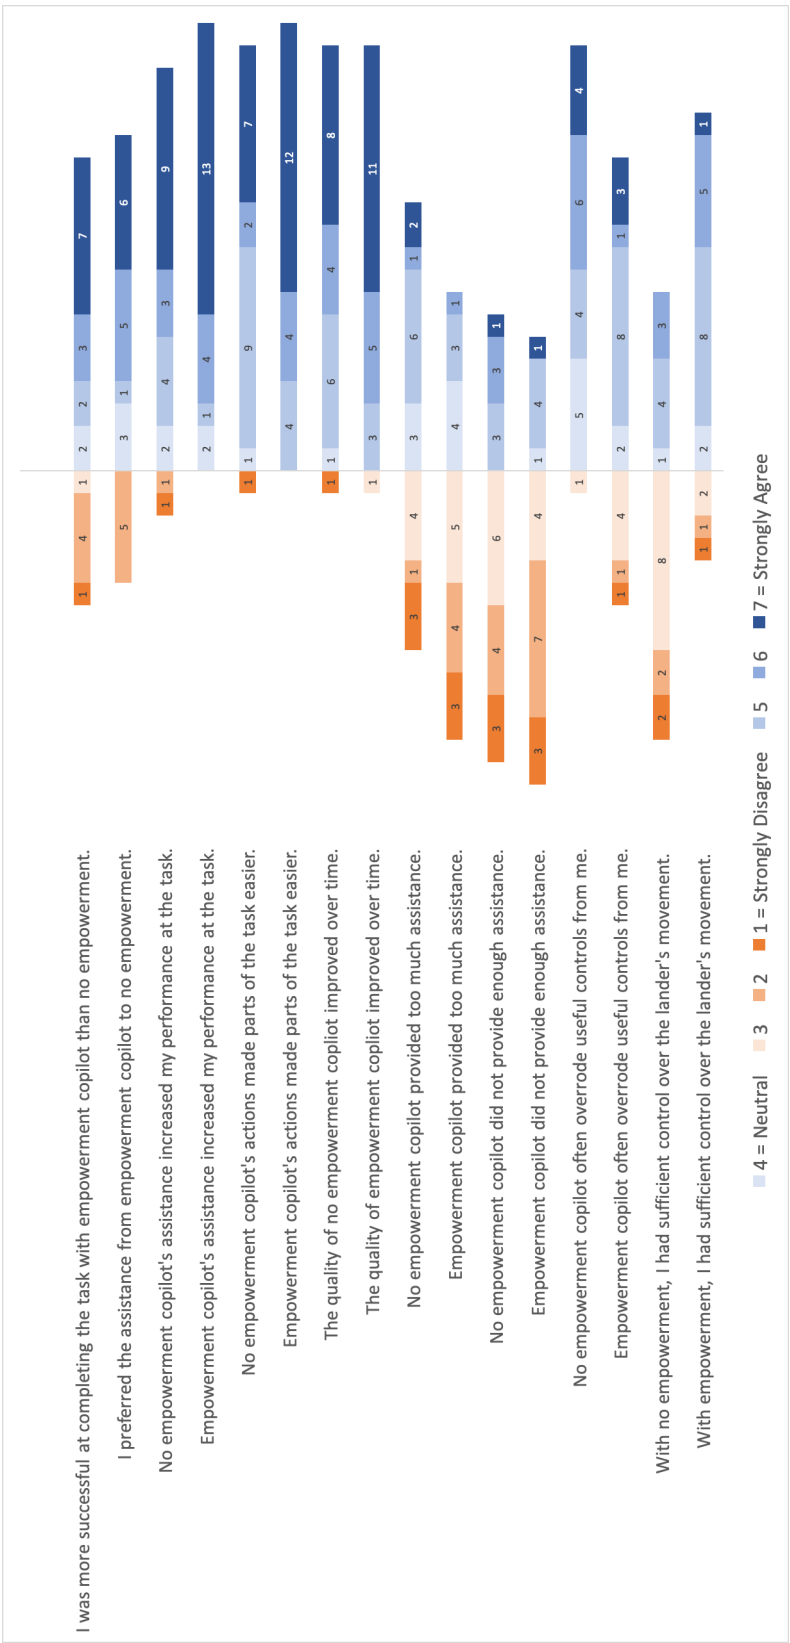

Figure 1: Survey responses from Lunar Lander User Study
